# Supplementary material for: Deep continental roots and cratons
Source: Springer Nature journal article supplement (doi:10.1038/s41586-021-03600-5), 2021-08-11
Supplement: 41586_2021_3600_MOESM1_ESM.pdf [file 41586_2021_3600_MOESM1_ESM.pdf]

## Supplementary information

---

# Deep continental roots and cratons

---

In the format provided by the  
authors and unedited

## SUPPLEMENTARY NOTES

### Supplementary Figure 1a: Seismic imaging of continental mantle.

Global S-wave tomographic slice (oceans excluded) through the Earth at 150 km depth. The scale bar displays % Vs anomalies relative to a modified AK135 reference model [References 23 and 24 of the main manuscript]. Colour scale is the “Vik” scheme derived using the recommendations for colour scales on maps [Reference 166 of the main manuscript].

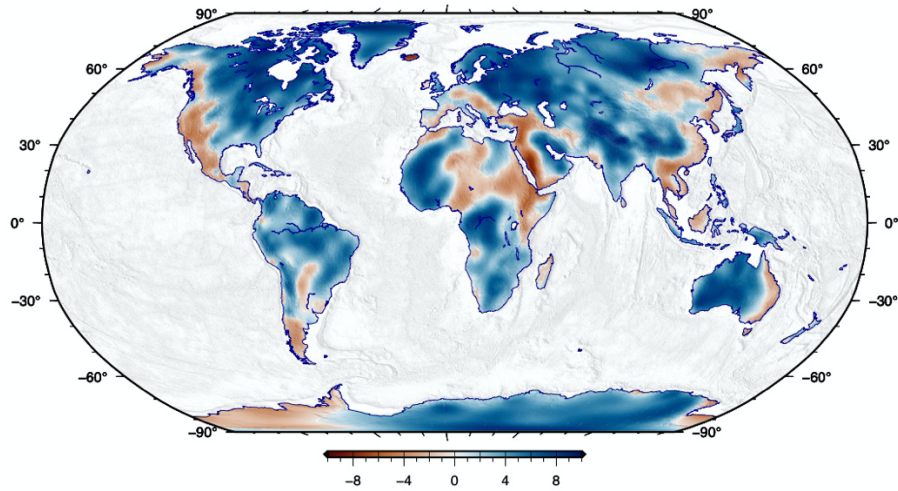

## Supplementary Figure 1b : Seismic tectonic regionalisation of lithosphere.

Tectonic regionalisation [using the method of reference 23 – Main Manuscript] of the seismic data to objectively classify seismic velocities into regions of similarity within the Earth's upper mantle; falling out naturally from this is the division of continents from oceans (not shown), and the subdivision of continents into cratonic very deep lithosphere (green) that broadly coincides with the Archean crustal nuclei to cratons, cratonic deep lithosphere (150 km thick or more – blue colour), broadly coinciding with the Super-cratons and Composite cratons defined in Fig. 1 of the main manuscript, and non-cratonic mantle underpinned by lithospheric mantle extending to <150km to the lithosphere-asthenosphere boundary (grey shading). Diagonal stripes cover regions with apparent thick lithosphere that are strongly influenced by subducting slabs and are not classified as cratons. The boundaries of the **cratons as a whole**, as defined as the edges of the blue shaded regions, underpinned by lithosphere > 150km thick, **comprise 63% of the total continental landmass**. **Cratonic nuclei** with the deepest lithospheres, from this classification occupy ~ **34% of the total continental landmass**.

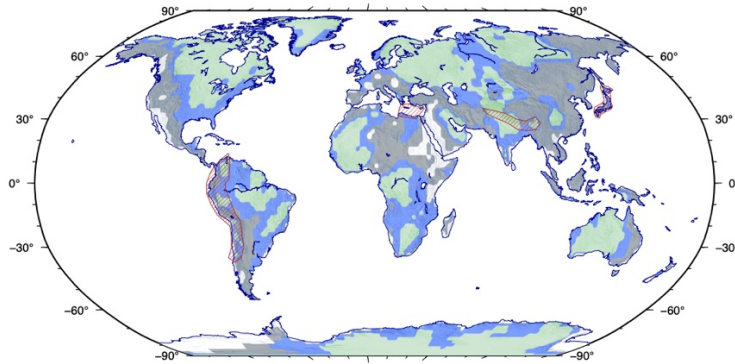

### **Box 3a: Locations grouped by type of craton in Re-Os model age compilation**

Names are either the name of a given mine, or the location of the host kimberlite, lamproite or basalt

#### ***Archean Cratonic Mantle:***

*Kalahari craton Archean nuclei* – Letseng Mine, Lhiqhobong Mine, Matsoku, Mothae Mine, Thaba Putsoa, Newlands Mine, Monastery Mine, Kimberley Mines (Bultfontein), Jagersfontein Mine, Finsch Mine, Murowa Mine.

*Karelian craton* – Kaavi, Kaavi-Kupio

*Rae craton* – Somerset Island, Repulse Bay, Pelly Bay, Darby

*Slave craton* – Jericho Mine, Diavik Mine, Ekati Mine, Artemisia, Gahcho Kué

*North Atlantic Craton* – Chidliak Mine (Baffin Island), Safartoq (W. Greenland), Nigerlikasik and Pyramidefjeld (W. Greenland)

*Superior craton* – Attawapiskat

*Eastern North China craton* – Fuxian, Mengyin (Pre-lithosphere thinning kimberlites).

*Wyoming craton* – Eagle buttes, Williams

*Sask craton* – Fort a la Corne

#### ***Proterozoic Cratonic Mantle***

*Kalahari composite craton* – Venetia Mine, Orapa Mine, Lethlakane, Namaqua-Natal terrane kimberlites (Ramatseliso, East Griqualand, Abbotsford, Melton Wold, Uintjiesberg, Markt, Hebron, Hoedkop, Gansfontein, Klipfontein), Rehoboth terrane kimberlites (Gibeon field)

*Congo composite craton* – Usagaran terrane (Labait, Tanzania)

*Western Australian composite craton* – Argyle Mine

*Laurentia Super-craton* – Mackenzie craton (Parry Peninsula), Victoria Island; Hearne Terrane (Buffalo Head Hills), Central Plains Orogen (Sloan)

*South American Super-craton* - Alto Paranaiba

*Siberian composite craton* – Udachnaya Mine, Obnazhennaya

#### ***Modified Cratonic Mantle***

*South East Siberia* – Tok

*East China craton* – Longquanlongwan, Kuandian, Hanuoba, Qixia, Yangyuan, Jining, Datong, Fansi, Fushan, Hebi, Dalongwan, Penglai, Shanwang, Baekryeong Island, Jeju Island, Pyeongtaek

*Colorado Plateau* - Big Creek

*Mojavia* – Cima

*West Greenland* – Ubekent Ejland

*East Greenland* - Wiedemann Fjord

#### ***Phanerozoic Oceanic Mantle (Abyssal, Arcs, Ophiolites)***

*Abyssal* – Mid Atlantic Ridge Hole 1274A (ODP Leg 209), Kane Fracture Zone, SW Indian and American-Antarctic Ridges, MAR 15 20 FZ Cruise: Academic Boris Petrov, SWIR Atlantic II FZ Cruise: Robert Conrad 27-9, SWIR Du Toit FZ Cruise: Protea 5, Gakkal ridge (Arctic Ocean), Lena Trough, Arctic basin, Mid Atlantic Ridge (MAR) Saint Paul Fracture Zone

*Ophiolites* – Tiebaghi massif, New Caledonia; Ouassé Bay, New Caledonia; Me Maoya massif, New Caledonia; Massif du Sud, New Caledonia; Poum, New Caledonia; Babouillat, New Caledonia; Poum, New Caledonia; Babouillat, New Caledonia; Kopeto, New Caledonia; Mamonia complex, Cyprus, Troodos, Cyprus; Oman Ophiolite, Shetland Ophiolite, Taitao ophiolite; southern Chile, Koycegiz,

Turkey; Tekirova, Turkey, Marmaris, Turkey; Macquarie Island, Australia, Ligurian ophiolites, Italy; Totalp, Austria; Purang ophiolite, southwestern Tibet; Central Tibet - Bangong-Nuijiang suture zone; Yarlung-Zangbo ophiolite, Tibet;  
*Arcs* – Kamchatka (Bakening, Avachinsky, Valovayam; Cascade arc (Simcoe); Japan arc (Ichinomegata); SW Japan (Kurose); Bismark Archipelago (PNG); Izu-Bonin-Mariana Forearc, Conical seamount.

### **Box 3b: Locations plotted on Age versus olivine composition plot**

- 1) Siberia (Udachnaya, Archean samples, plus Obnazhennaya)
- 2) Argyle, Australia
- 3) Kalahari craton - Kaapvaal nucleus (excluding Kimberley & Premier)
- 4) Tanzania craton
- 5) Kalahari Craton - Kaapvaal nucleus (Kimberley)
- 6) Wyoming craton
- 7) North Atlantic Craton (E, W. and SW Greenland)
- 8) Slave craton
- 9) Congo craton
- 10) Kalahari Craton - Zimbabwe nucleus (Murowa-Sese)
- 11) North China craton (Archean samples)
- 12) Rae craton - Somerset Island
- 13) Kalahari craton - East Griqualand
- 14) Kalahari craton - Namaqualand
- 15) Kalahari craton - Namibia
- 16) Kalahari Craton - Kaapvaal nucleus (Premier)
- 17) Siberia (Udachnaya, Proterozoic samples)
- 18) Pyrenees orogenic massifs
- 19) Parry Peninsula & Victoria Island
- 20) North China Craton (Post-Archean samples)
- 21) Ronda Massif, Spain
- 22) China - Songshugou
- 23) San Carlos - USA
- 24) Bay of Islands Ophiolite
- 25) Iwanadake ophiolite, Japan
- 26) Dun Mountain ophiolite, New Zealand
- 27) Ontong Java Plateau, Pacific Ocea
- 28) Anita peridotite, New Zealand
- 29) Mariana Arc, Pacific Ocean
- 30) Kamchatka, Russia
- 31) South Sandwich Islands, S. Atlantic Ocean
- 32) Lihir Island, Papua New Guinea
- 33) Japan arc-related mantle xenoliths - various locations
